# Supplementary material for: A multi-organoid platform identifies CIART as a key factor for SARS-CoV-2 infection
Source: PubMed Central journal article supplement (PMC10014579; doi:10.1038/s41556-023-01095-y), 2023-03-13

Extended Data Fig. 1g

No staining

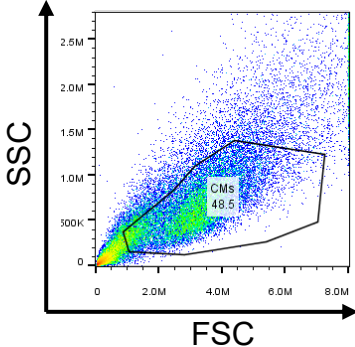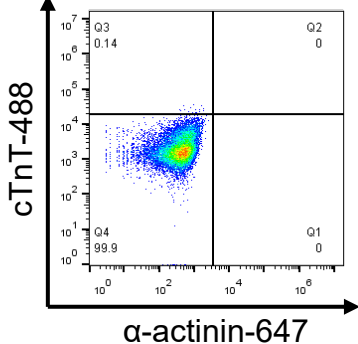

Isotype

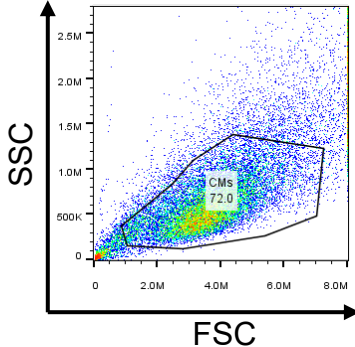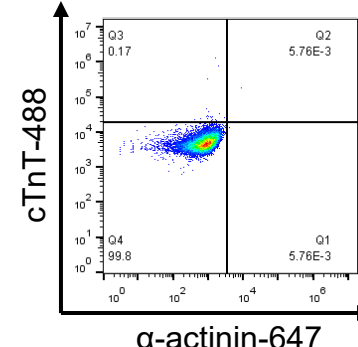

CMs

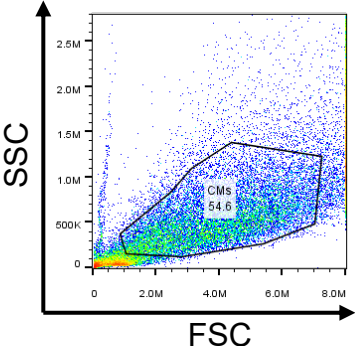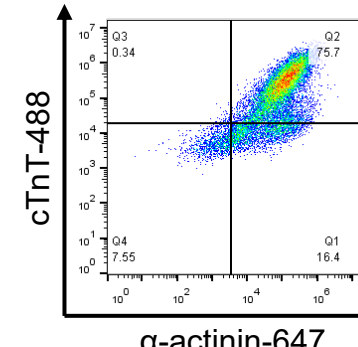

Supplement: 41556_2023_1095_MOESM7_ESM.pdf [file 41556_2023_1095_MOESM7_ESM.pdf]
