# Supplementary material for: A multi-organoid platform identifies CIART as a key factor for SARS-CoV-2 infection
Source: PubMed Central journal article supplement (PMC10014579; doi:10.1038/s41556-023-01095-y), 2023-03-13

**Extended Data Fig. 3d**

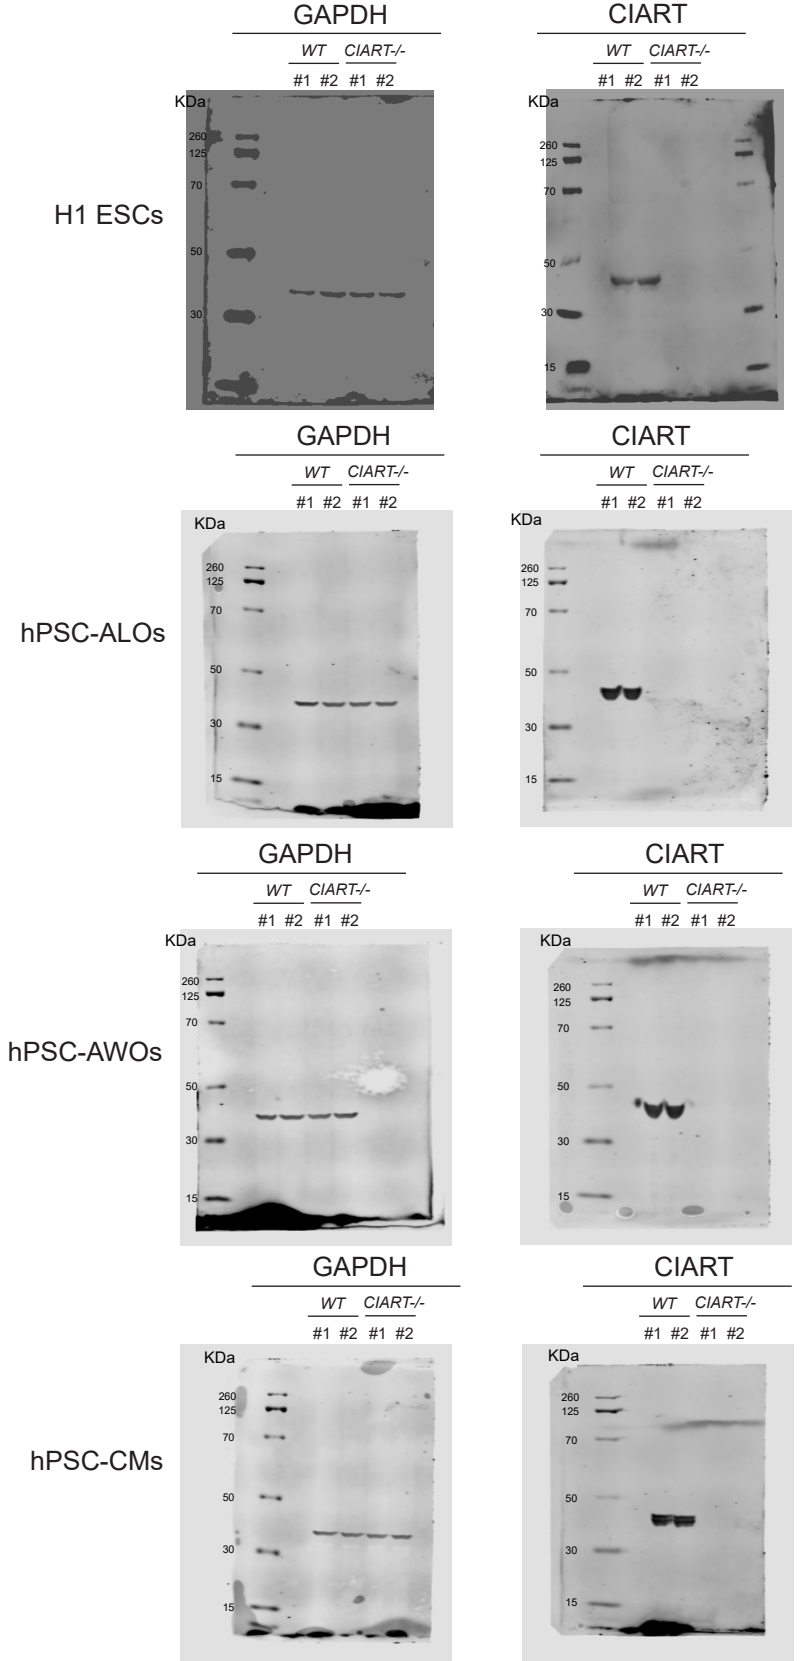

Supplement: 41556_2023_1095_MOESM9_ESM.pdf [file 41556_2023_1095_MOESM9_ESM.pdf]
